# Supplementary material for: Deciphering fibroblast-induced drug resistance in non-small cell lung carcinoma through patient-derived organoids in agarose microwells
Source: Royal Society of Chemistry journal article supplement (doi:10.1039/d3lc01044a), 2024-01-01
Supplement: d3lc01044a1.pdf [file d3lc01044a1.pdf]

## Supplementary materials

# **Deciphering Fibroblast-Induced Drug Resistance in Non-Small Cell Lung Carcinoma through Patient-Derived Organoids in Agarose Microwells**

Qiyue Luan,<sup>1</sup> Ines Pulido,<sup>2,3</sup> Angelique Isagirre,<sup>1</sup> Julian Carretero,<sup>4</sup> Jian Zhou,<sup>1,3</sup> Takeshi Shimamura,<sup>2,3</sup> and Ian Papautsky<sup>1,3\*</sup>

<sup>1</sup>Department of Biomedical Engineering, University of Illinois Chicago, Chicago, IL 60607, USA

<sup>2</sup>Department of Surgery, University of Illinois Chicago, Chicago, IL 60612, USA

<sup>3</sup>University of Illinois Cancer Center, Chicago, IL 60612, USA

<sup>4</sup>Departament de Fisiologia, Facultat de Farmacia, Universitat de Valencia, Burjassot, 46010, Spain

\*Address of correspondence

Dr. Ian Papautsky

Department of Biomedical Engineering

851 S. Morgan Street, 218 SEO

University of Illinois Chicago

Chicago, IL 60607, USA

E-mail: papauts@uic.edu; Tel: +1 312.413.3800

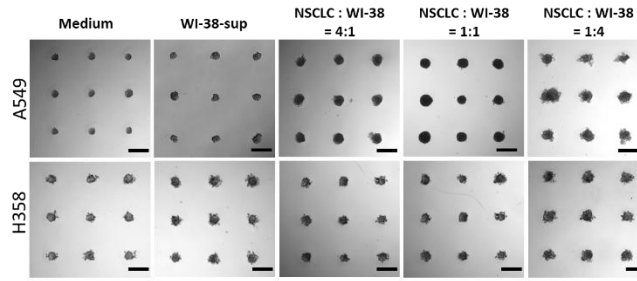

**Figure S1.** NSCLC cell lines A549 and NCI-H358 were co-cultured with fibroblasts in agarose microwells and formed tight spheroids. Scale bars: 200 $\mu$ m.

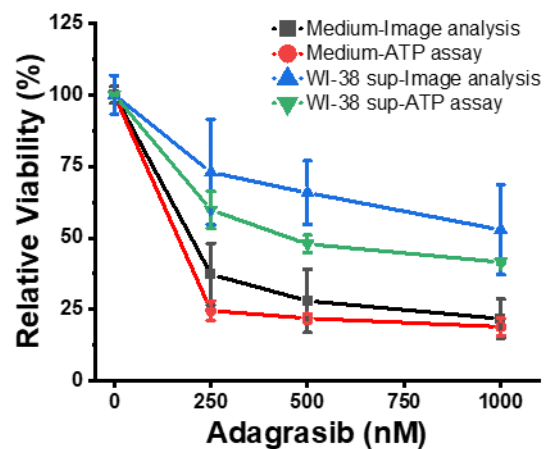

**Figure S2.** The comparison of 3D cell viability evaluation methods between live/dead staining images and ATP luminescence assays. The cytotoxicity of H358 spheroids following adagrasib treatment with normal culture medium and WI-38 supernatant were analyzed by z-stack live/dead fluorescent images and ATP luminescence assays.

|                | A549 |     | NCI-H358 |    | WI-38 |      |
|----------------|------|-----|----------|----|-------|------|
| <b>TH01</b>    | 8    | 9.3 | 6        | 6  | 8     | 9.3  |
| <b>D21S11</b>  | 29   | 29  | 28       | 30 | 30    | 30.2 |
| <b>D5S818</b>  | 11   | 11  | 10       | 12 | 10    | 10   |
| <b>D13S317</b> | 11   | 11  | 8        | 12 | 11    | 11   |
| <b>D7S820</b>  | 8    | 11  | 10       | 11 | 9     | 11   |
| <b>D16S539</b> | 11   | 12  | 12       | 13 | 11    | 12   |
| <b>CSF1PO</b>  | 10   | 12  | 11       | 12 | 10    | 12   |
| <b>AMEL</b>    | X    | Y   | X        | Y  | X     | X    |
| <b>vWA</b>     | 14   | 14  | 17       | 17 | 19    | 20   |
| <b>TPOX</b>    | 8    | 11  | 8        | 9  | 8     | 8    |

**Table S1.** STR profiles of the cell lines A549, NCI-H358, and WI-38 used in this study.

|                       | <b>CAF41</b> | <b>CAF63</b> |
|-----------------------|--------------|--------------|
| <b>Mutation</b>       | EGFR L858R   | KRAS G12C    |
| <b>Age</b>            | 48           | 62           |
| <b>Sex</b>            | Female       | Male         |
| <b>Stage</b>          | IB           | IA           |
| <b>Smoking status</b> | Non-smoker   | Ex-smoker    |

**Table S2.** The clinicopathological features of the patients from whom the CAF41/CAF63 were derived.
